# Supplementary material
Source: ML conference proceedings conference paper supplement (https://openaccess.thecvf.com/content/ICCV2023/html/Metzen_Identification_of_Systematic_ICCV_2023_paper.html)
Supplement: Supplementary file 1 [file Metzen_Identification_of_Systematic_ICCV_2023_supplemental.pdf]

## A. Search procedure

In this work, we use combinatorial testing (CT) [38, 4] for searching systematic errors in the operational design domain. CT selects the set of subgroups to be tested a priori without taking the classifier’s loss on subgroups into account when selecting the next subgroup. This has the advantage of providing certain coverage guarantees with respect to the ODD, e.g., pairwise testing ( $n_C = 2$ ) will test every combination of two attributes at least once. Moreover, CT also allows evaluating multiple loss functions concurrently. However, a potential disadvantage is that CT does not search explicitly for subgroups of maximal loss and might thus be less efficient compared to targeted search procedures such as evolutionary algorithms (EAs). We compare CT with an EA in this section. The EA uses a population size of 25, tournament selection with tournament size 3, mutation probability 0.6, crossover probability 0.3, and resampling probability 0.1. In a mutation, a single semantic dimension is reset to a random value from the possible values of the respective dimension. In a crossover, values from the two genotypes are selected randomly with equal probability.

Figure 9 compares CT with this EA on the Vehicle Experiment from Section 5. Here, EA maximizes the risk for the “pickup” target class. We observe that EA outperforms CT for  $n_C \in \{3, 4, 5\}$  on the risk for the pickup target class, but with a relatively small difference. However, EA performs subpar for other target classes, which indicates that every target class would require a separate EA run per target class. In contrast, a single run of CT performs reasonable well on all target classes. In summary, we use CT in this paper because it allows assessing the risk of multiple target classes concurrently within a single run.

## B. ImageNet Experiments

### B.1. Experimental Setting: Vehicle Experiment

We evaluate the following models with weights for image classification on ImageNet1k from torchvision [36]: VGG16 [47], ResNet50 [21], ConvNeXt-B [32], ViT-B/16 [12], and ViT-L/32 [12]. We focus on a subset of classes belonging to the vehicle subcategory, more specifically on misclassifying samples of the class “minivan”  $\hat{y} = y_{minivan}$  into other classes that have a distance of 2 in the WordNet [14] hierarchy:

- amphibian, amphibious vehicle (id: 408)
- fire engine, fire truck (id: 555)
- garbage truck, dustcart (id: 569)
- go-kart (id: 573)
- golfcart, golf cart (id: 575)
- moving van (id: 675)
- pickup, pickup truck (id: 717)

- police van, police wagon, paddy wagon, patrol wagon, wagon, black Maria (id: 734)
- snowplow, snowplough (id: 803)
- tow truck, tow car, wrecker (id: 864)
- trailer truck, tractor trailer, trucking rig, rig, articulated lorry, semi (id: 867)

We exclude classes with a WordNet distance of 1 since their visual appearance might be very similar to a “minivan” and our focus is not on fine-grained misclassifications.

We focus on an operational design domain  $\mathbf{Z}$  with five semantic dimensions with the following values:

- *viewpoint*: center, side, front, rear
- *object size*: “”, small, large, huge
- *object color*: “”, black, white, gray, red, green, blue, yellow, orange, purple, magenta, cyan, brown
- *weather*: “”, rainy, snowy, lightning, foggy, sunny
- *background*: background, forest, desert, lake, mountain, beach, city, river, house, tree, field, lawn, garden, street, people

The first of the possible values corresponds to a neutral choice, by which a specific dimension is not controlled. We observed that this can be preferable if a dimension is not relevant and leaving it empty simplifies the prompt for the text-to-image model. We use the prompt template

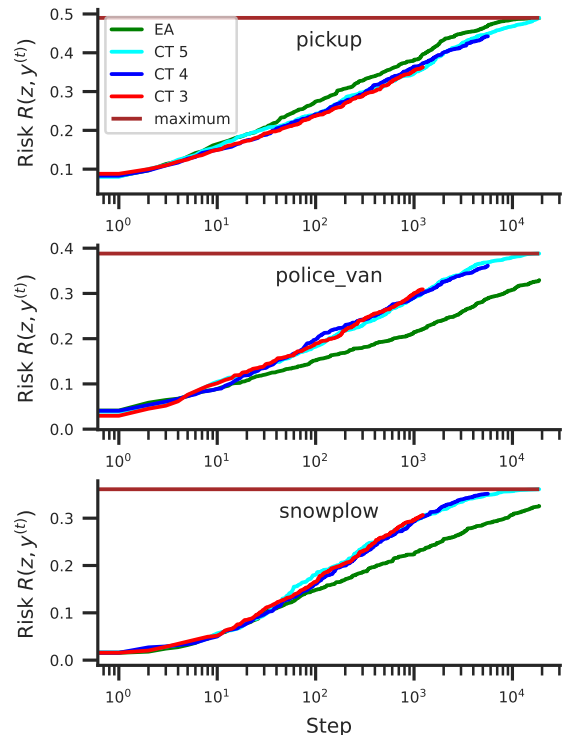

Figure 9. Comparison of an Evolutionary Algorithm (EA) and Combinatorial  $n_C$ -wise Testing (CT  $n_C$ ). Step refers to the number of subgroups explored, lines show highest risk of any subgroup tested thus far, averaged over 100 repetitions. “Maximum” refers to the highest risk of any subgroup in the operational domain.

$T_p = \{\text{viewpoint}\} \text{ view of } \{\text{size}\} \{\text{color}\} (\text{minivan:1.5})$   
in front of  $\{\text{weather}\} \{\text{background}\}$ ". We use combinatorial testing with  $n_C = 3$ , exploring  $|\mathbf{Z}_C| = 1.230$  out of  $|\mathbf{Z}| = 4 * 4 * 13 * 6 * 15 = 18.720$  subgroups, and generate  $n_S = 16$  image samples per subgroup using Stable Diffusion v1.5. We employ allpairsy [1] for combinatorial testing. See Table 1 for detailed results.

## B.2. Experimental Setting: Person Experiment

We evaluate the following models with weights for image classification on ImageNet21k from timm [52]: MLP-Mixer-B/16 and MLP-Mixer-L/16 [49]. We focus on misclassifying samples of the class "homo"  $\tilde{y} = y_{homo}$  (id: 3574) into the class "ape" (id: 3569). We skip logits corresponding to all other classes (some of which might be larger than the ones for homo and ape) and thus analyze effectively a hypothetical binary classifier derived from the pretrained 21k-class models without any finetuning.

We focus on an operational design domain  $\mathbf{Z}$  with five semantic dimensions with the following values:

- *age*: "", young, old
- *gender*: "", female, male
- *geographic region*: "", european, american, hispanic, russian, arab, chinese, indian, african, australian
- *hairtype*: "", curly, short, long, blond, black, red, brown, gray
- *background*: background, forest, desert, lake, mountain, beach, city, river, house, tree, field, lawn, garden, street, people

The first of the possible values corresponds to a neutral choice, by which a specific dimension is not controlled. We observed that this can be preferable if a dimension is not relevant and leaving it empty simplifies the prompt for the text-to-image model. We use the prompt template  $T_p = \text{"A } \{\text{age}\} \{\text{gender}\} \{\text{region}\} (\text{person:1.5}) \text{ with } \{\text{hairtype}\} \text{ hairs in front of } \{\text{background}\}"$ . We use combinatorial testing with  $n_C = 3$ , exploring  $|\mathbf{Z}_C| = 1.371$  out of  $|\mathbf{Z}| = 3 * 3 * 10 * 9 * 15 = 12.150$  subgroups, and generate  $n_S = 16$  image samples per subgroup using Stable Diffusion v1.5. We employ allpairsy [1] for combinatorial testing. See Table 2 for detailed results.

## C. Samples Zero-Shot Benchmark

We illustrate samples obtained for different hyperparameter settings that were quantitatively evaluated as part of the zero-shot systematic error benchmark (see Section 4.2). Figure 10 illustrates samples for different versions of Stable Diffusion [43]. Figure 11 illustrates samples for different number of steps  $n_t$  of the DPMSolver++ [33, 34]. Figure 12 illustrates samples for different prompt class weights  $w_c$  in the prompt template  $T_p = \text{"An image of a } color \text{ type } (car:w_c) \text{ with a } background \text{ background."}$ .

## D. Samples ImageNet Experiments

We illustrate 30 samples of source class "minivan" misclassified as "snowplow" (Figure 13), "pickup" (Figure 14), and "police van" (Figure 15). Moreover, we illustrate 30 samples of source class "person" misclassified as "ape" (Figure 16).

| (Target) class       | viewpoint | size  | color  | weather   | background | $R(\mathbf{z}, \mathbf{y}^{(t)})$ |
|----------------------|-----------|-------|--------|-----------|------------|-----------------------------------|
| ConvNeXt-B           |           |       |        |           |            |                                   |
| minivan              | front     | -     | -      | sunny     | people     | 0.436                             |
| amphibian            | center    | small | brown  | foggy     | river      | 0.066                             |
| moving_van           | front     | huge  | blue   | rainy     | garden     | 0.093                             |
| pickup               | front     | -     | -      | sunny     | people     | 0.270                             |
| police_van           | front     | -     | black  | rainy     | street     | 0.140                             |
| snowplow             | front     | huge  | purple | snowy     | field      | 0.129                             |
| ViT-L/32             |           |       |        |           |            |                                   |
| minivan              | front     | -     | -      | sunny     | people     | 0.332                             |
| amphibian            | side      | huge  | black  | -         | river      | 0.096                             |
| moving_van           | rear      | large | yellow | foggy     | field      | 0.216                             |
| pickup               | front     | -     | -      | sunny     | people     | 0.328                             |
| police_van           | front     | huge  | yellow | lightning | street     | 0.177                             |
| snowplow             | rear      | small | orange | snowy     | forest     | 0.285                             |
| ViT-B/16             |           |       |        |           |            |                                   |
| minivan              | front     | -     | black  | rainy     | people     | 0.283                             |
| amphibian            | center    | small | red    | foggy     | river      | 0.124                             |
| moving_van           | rear      | large | yellow | foggy     | garden     | 0.202                             |
| pickup               | front     | -     | red    | lightning | people     | 0.288                             |
| police_van           | front     | -     | black  | rainy     | people     | 0.151                             |
| snowplow             | rear      | small | orange | snowy     | forest     | 0.275                             |
| ResNet50             |           |       |        |           |            |                                   |
| minivan              | front     | -     | -      | sunny     | people     | 0.597                             |
| amphibian            | center    | small | brown  | foggy     | river      | 0.065                             |
| moving_van           | center    | small | yellow | snowy     | street     | 0.095                             |
| pickup               | front     | -     | -      | sunny     | people     | 0.250                             |
| police_van           | front     | large | green  | lightning | house      | 0.323                             |
| snowplow             | center    | large | black  | snowy     | street     | 0.187                             |
| VGG16                |           |       |        |           |            |                                   |
| minivan              | rear      | small | yellow | rainy     | city       | 0.583                             |
| amphibian            | center    | -     | orange | foggy     | beach      | 0.118                             |
| moving_van           | front     | huge  | yellow | sunny     | house      | 0.195                             |
| pickup               | front     | -     | -      | sunny     | people     | 0.344                             |
| police_van           | rear      | small | yellow | rainy     | city       | 0.293                             |
| snowplow             | rear      | small | orange | snowy     | forest     | 0.317                             |
| Averaged over models |           |       |        |           |            |                                   |
| minivan              | front     | -     | -      | sunny     | people     | 0.408                             |
| amphibian            | center    | small | brown  | foggy     | river      | 0.066                             |
| moving_van           | front     | huge  | blue   | rainy     | garden     | 0.093                             |
| pickup               | front     | -     | -      | sunny     | people     | 0.270                             |
| police_van           | front     | -     | black  | rainy     | street     | 0.140                             |
| snowplow             | front     | huge  | purple | snowy     | field      | 0.129                             |

Table 1. Detailed results for the “Vehicle Experiment” discussed in Section 5. We summarize systematic errors for source class  $\tilde{\mathbf{y}}$  = “minivan” (higher  $R(\mathbf{z})$  corresponding to stronger error) and systematic misclassifications into  $\mathbf{y}^{(t)} \in \{\text{“amphibian”, “moving_van”, “pickup”, “police_van”, “snowplow”}\}$  (higher  $R(\mathbf{z}, \mathbf{y}^{(t)})$  corresponding to stronger misclassifications). For each of the 5 studied models as well as averaged over all models, we show the subgroup corresponding to the strongest systematic error/misclassification and the corresponding risk  $R$ . The three highlighted lines correspond to the subgroups shown in Figure 1. Overall, identified subgroups differ considerably across models.

| (Target) class | age   | gender | region     | hairtype | background | $R(\mathbf{z}, \mathbf{y}^{(t)})$ |
|----------------|-------|--------|------------|----------|------------|-----------------------------------|
| Mixer-B/16     |       |        |            |          |            |                                   |
| ape            | old   | male   | african    | long     | background | 0.44462                           |
| ape            | old   | female | hispanic   | red      | tree       | 0.37845                           |
| ape            | old   | male   | african    | black    | mountain   | 0.35407                           |
| ape            | old   | male   | african    | red      | background | 0.32113                           |
| ape            | old   | male   | african    | curly    | garden     | 0.31325                           |
| ape            | old   | male   | african    | -        | people     | 0.29942                           |
| ape            | old   | female | european   | curly    | tree       | 0.29639                           |
| ape            | old   | -      | african    | -        | city       | 0.29433                           |
| ape            | old   | female | -          | gray     | people     | 0.29029                           |
| ape            | old   | male   | african    | curly    | people     | 0.27311                           |
| ape            | young | -      | european   | short    | desert     | 0.00031                           |
| ape            | young | male   | hispanic   | brown    | desert     | 0.00031                           |
| ape            | young | female | european   | curly    | desert     | 0.00028                           |
| ape            | young | female | -          | curly    | desert     | 0.00027                           |
| ape            | young | -      | hispanic   | blond    | desert     | 0.00027                           |
| Mixer-L/16     |       |        |            |          |            |                                   |
| ape            | young | female | arab       | brown    | field      | 0.29910                           |
| ape            | old   | female | arab       | gray     | tree       | 0.27421                           |
| ape            | young | female | indian     | long     | tree       | 0.20752                           |
| ape            | old   | female | arab       | blond    | house      | 0.18673                           |
| ape            | young | female | arab       | brown    | tree       | 0.17659                           |
| ape            | young | female | arab       | brown    | lawn       | 0.17200                           |
| ape            | young | female | arab       | gray     | house      | 0.16944                           |
| ape            | young | female | arab       | short    | lawn       | 0.16491                           |
| ape            | -     | -      | australian | brown    | people     | 0.15520                           |
| ape            | young | female | arab       | short    | tree       | 0.15072                           |
| ape            | -     | female | hispanic   | curly    | street     | 0.00046                           |
| ape            | -     | -      | hispanic   | blond    | street     | 0.00036                           |
| ape            | young | -      | hispanic   | gray     | city       | 0.00034                           |
| ape            | young | male   | -          | curly    | street     | 0.00034                           |
| ape            | young | -      | hispanic   | black    | street     | 0.00027                           |

Table 2. Detailed results for the “Person Experiment” discussed in Section 5. We summarize systematic misclassifications into  $\mathbf{y}^{(t)} = \text{“ape”}$  (higher  $R(\mathbf{z}, \mathbf{y}^{(t)})$  corresponding to stronger misclassifications). For both studied models, we show the 10 subgroups corresponding to the top-ranked systematic misclassifications and the corresponding risk  $R$  as well as 5 subgroups where  $R \approx 0$ . We note that the two models have distinctive but different patterns in their top-ranked subgroups: An MLP-Mixer-B/16 [49] has several subgroups with high risk for “old male african” persons. An MLP-Mixer-L/16 [49] has several subgroups with high risk for “young female arab” persons. Moreover, the MLP-Mixer-L/16 has generally lower risk  $R(\mathbf{z}, \mathbf{y}^{(t)})$  among the top-ranked subgroups.

SD Version: v1-5

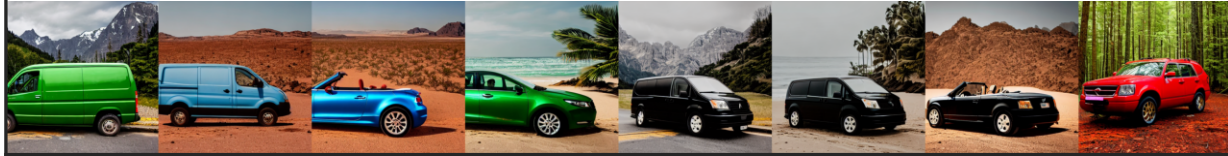

SD Version: 2-base

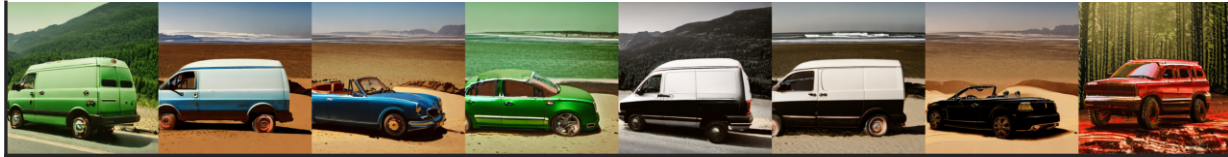

SD Version: 2-1-base

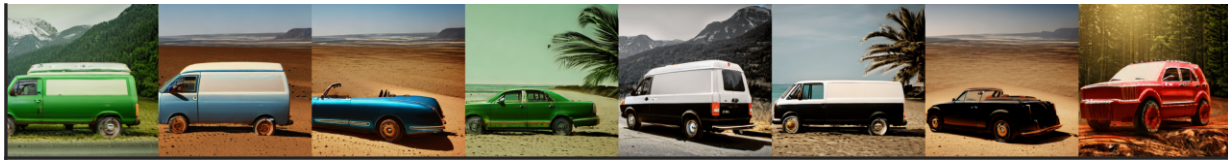

Figure 10. Samples for different versions of Stable Diffusion (SD) [43]. We observe that SD v1-5 results in samples with good attribute binding while for SD 2-base and SD 2-1-base, object colour leaks into the background. Moreover, objects sometimes exhibit only partially the specified colour, while larger parts are dyed in other colours such as white (specifically for vans) for SD 2-base and SD 2-1-base. SD v1-5 does not exhibit this issue. This explains the better performance of PROMPTATTACK with SD v1-5 in Section 4.2. The 8 samples from left to right were generated for the prompts:

- “an image of a green van (car:1.0) with a mountain background.”
- “an image of a blue van (car:1.0) with a desert background.”
- “an image of a blue cabriolet (car:1.0) with a desert background.”
- “an image of a green sedan (car:1.0) with a beach background.”
- “an image of a black van (car:1.0) with a mountain background.”
- “an image of a black van (car:1.0) with a beach background.”
- “an image of a black cabriolet (car:1.0) with a desert background.”
- “an image of a red SUV (car:1.0) with a forest background.”



Number Steps  $n_t$ : 3

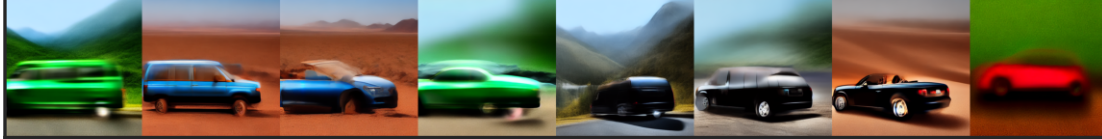

Number Steps  $n_t$ : 5

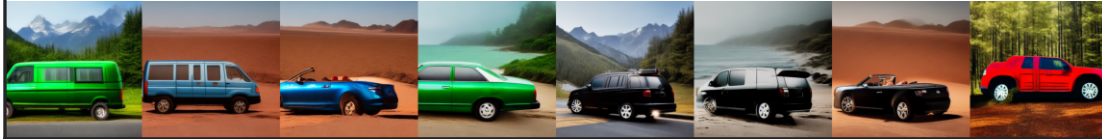

Number Steps  $n_t$ : 10

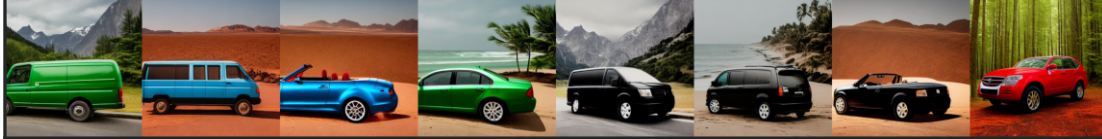

Number Steps  $n_t$ : 20

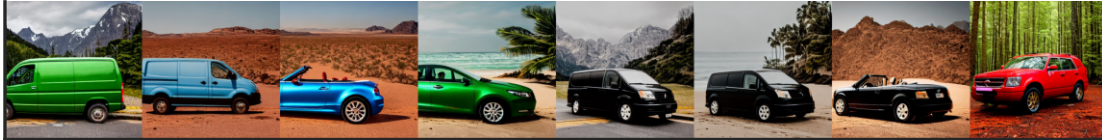

Figure 11. Samples for different number of steps  $n_t$  of the DPMSolver++ [33, 34]. As expected, more steps correspond to more realistic samples. However, even with  $n_t = 5$  steps, PROMPTATTACK is able to reliably identify systematic errors (see Section 4.2). The 8 samples from left to right were generated for the prompts:

- “an image of a green van (car:1.0) with a mountain background.”
- “an image of a blue van (car:1.0) with a desert background.”
- “an image of a blue cabriolet (car:1.0) with a desert background.”
- “an image of a green sedan (car:1.0) with a beach background.”
- “an image of a black van (car:1.0) with a mountain background.”
- “an image of a black van (car:1.0) with a beach background.”
- “an image of a black cabriolet (car:1.0) with a desert background.”
- “an image of a red SUV (car:1.0) with a forest background.”

Class Prompt Weight  $w_c$ : 1.0

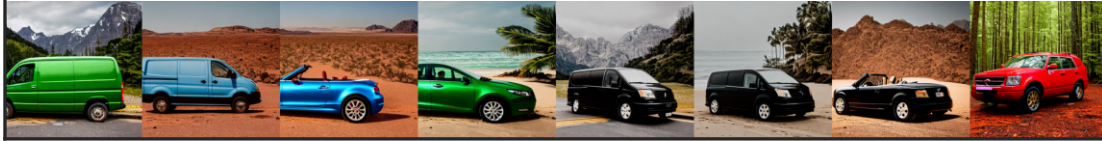

Class Prompt Weight  $w_c$ : 1.5

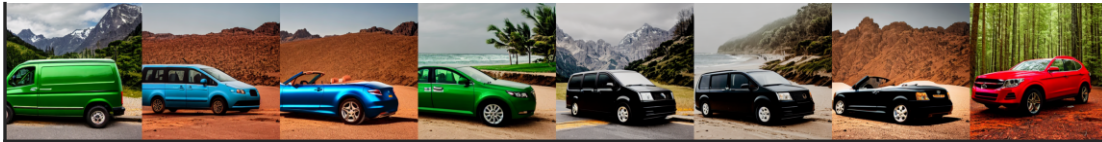

Class Prompt Weight  $w_c$ : 2.0

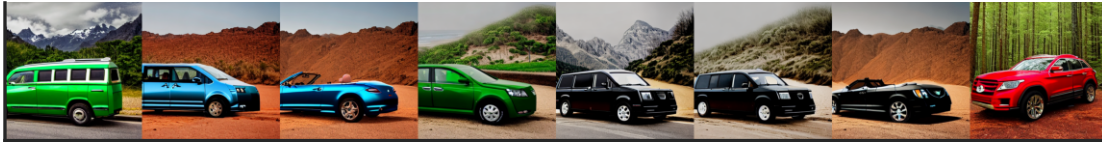

Class Prompt Weight  $w_c$ : 2.5

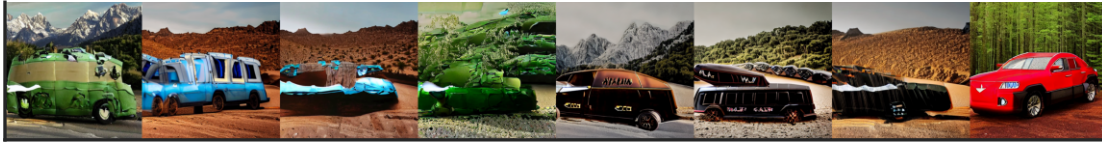

Figure 12. Samples for different prompt class weight  $w_c$  for the prompt template  $T_p$  = “An image of a *color type* (car: $w_c$ ) with a *background* background.”. The improved performance of PROMPTATTACK for  $w_c = 1.5$  and  $w_c = 1.5$  compared to  $w_c = 1.0$  is difficult to attribute to apparent visual properties of the samples. However, for  $w_c = 2.5$ , visual quality of samples strongly deteriorates, explaining the worse performance of PROMPTATTACK for this choice. The 8 samples from left to right were generated for the prompts:

- “an image of a green van (car: $w_c$ ) with a mountain background.”
- “an image of a blue van (car: $w_c$ ) with a desert background.”
- “an image of a blue cabriolet (car: $w_c$ ) with a desert background.”
- “an image of a green sedan (car: $w_c$ ) with a beach background.”
- “an image of a black van (car: $w_c$ ) with a mountain background.”
- “an image of a black van (car: $w_c$ ) with a beach background.”
- “an image of a black cabriolet (car: $w_c$ ) with a desert background.”
- “an image of a red SUV (car: $w_c$ ) with a forest background.”



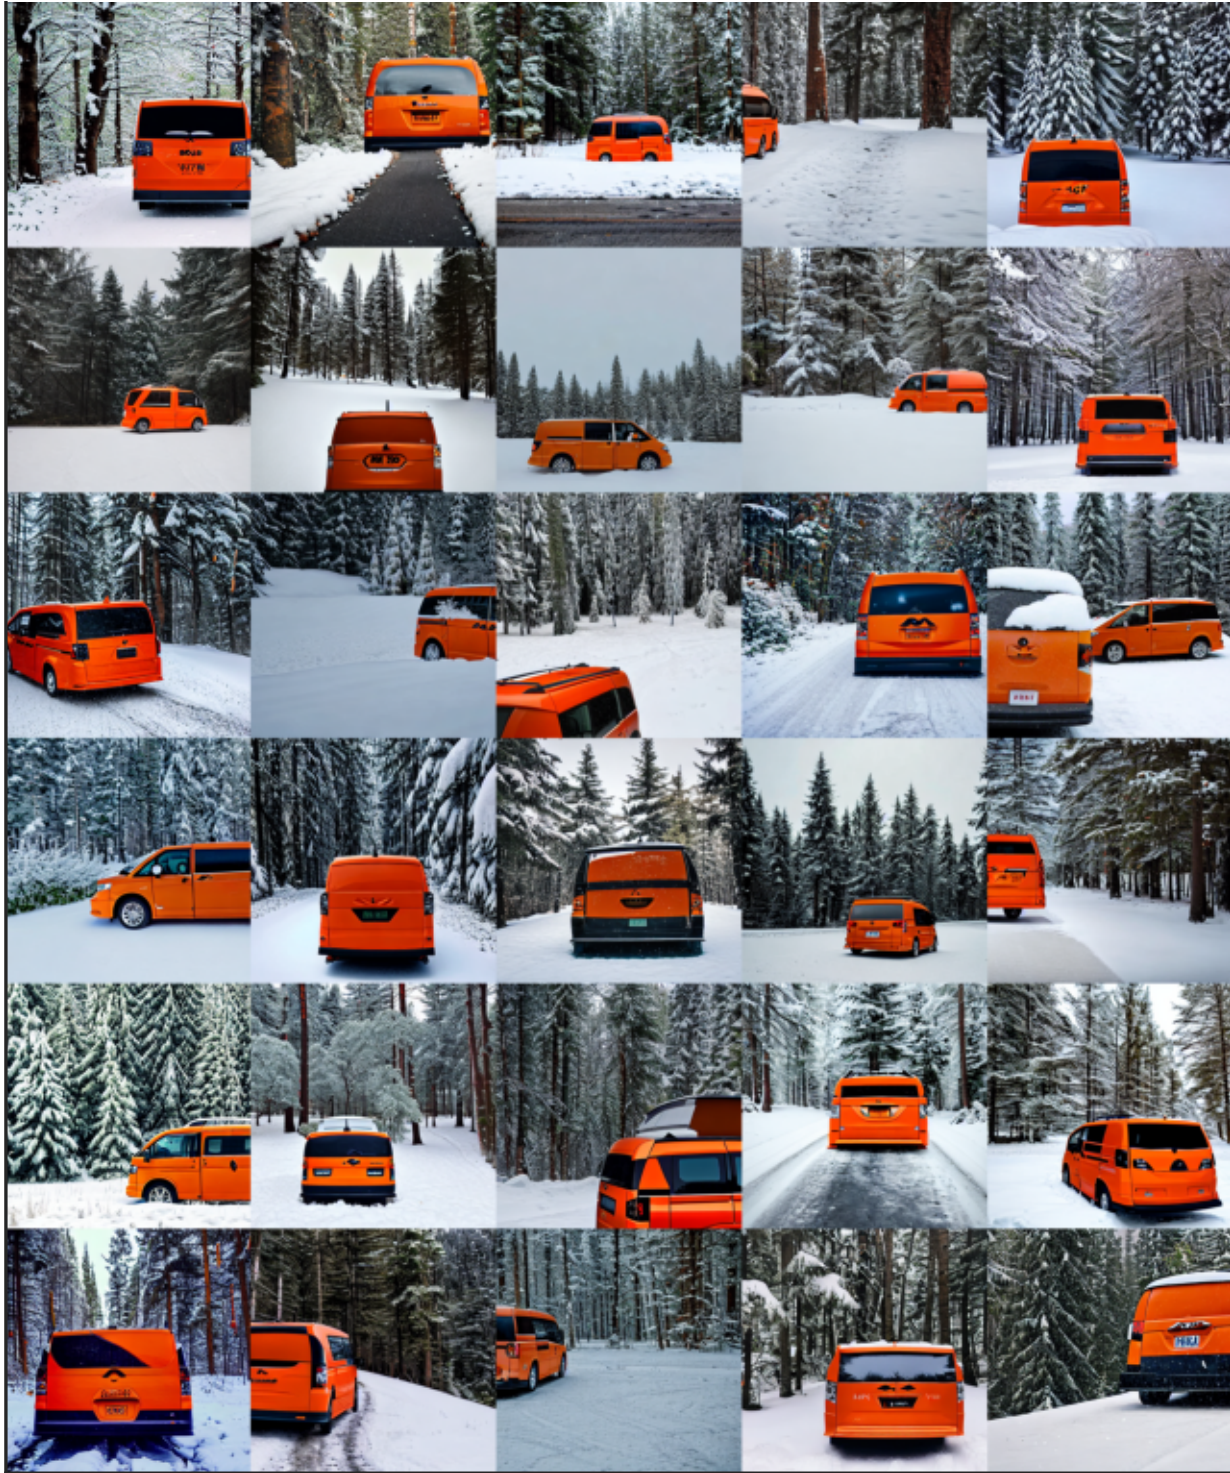

Figure 13. 30 samples from prompt “rear view of small orange (minivan:1.5) in front of snowy forest.” that are misclassified as snowplows by a VGG16. Please note that actual viewpoints are a mix of “side” and “rear” views, and not purely “rear” views.



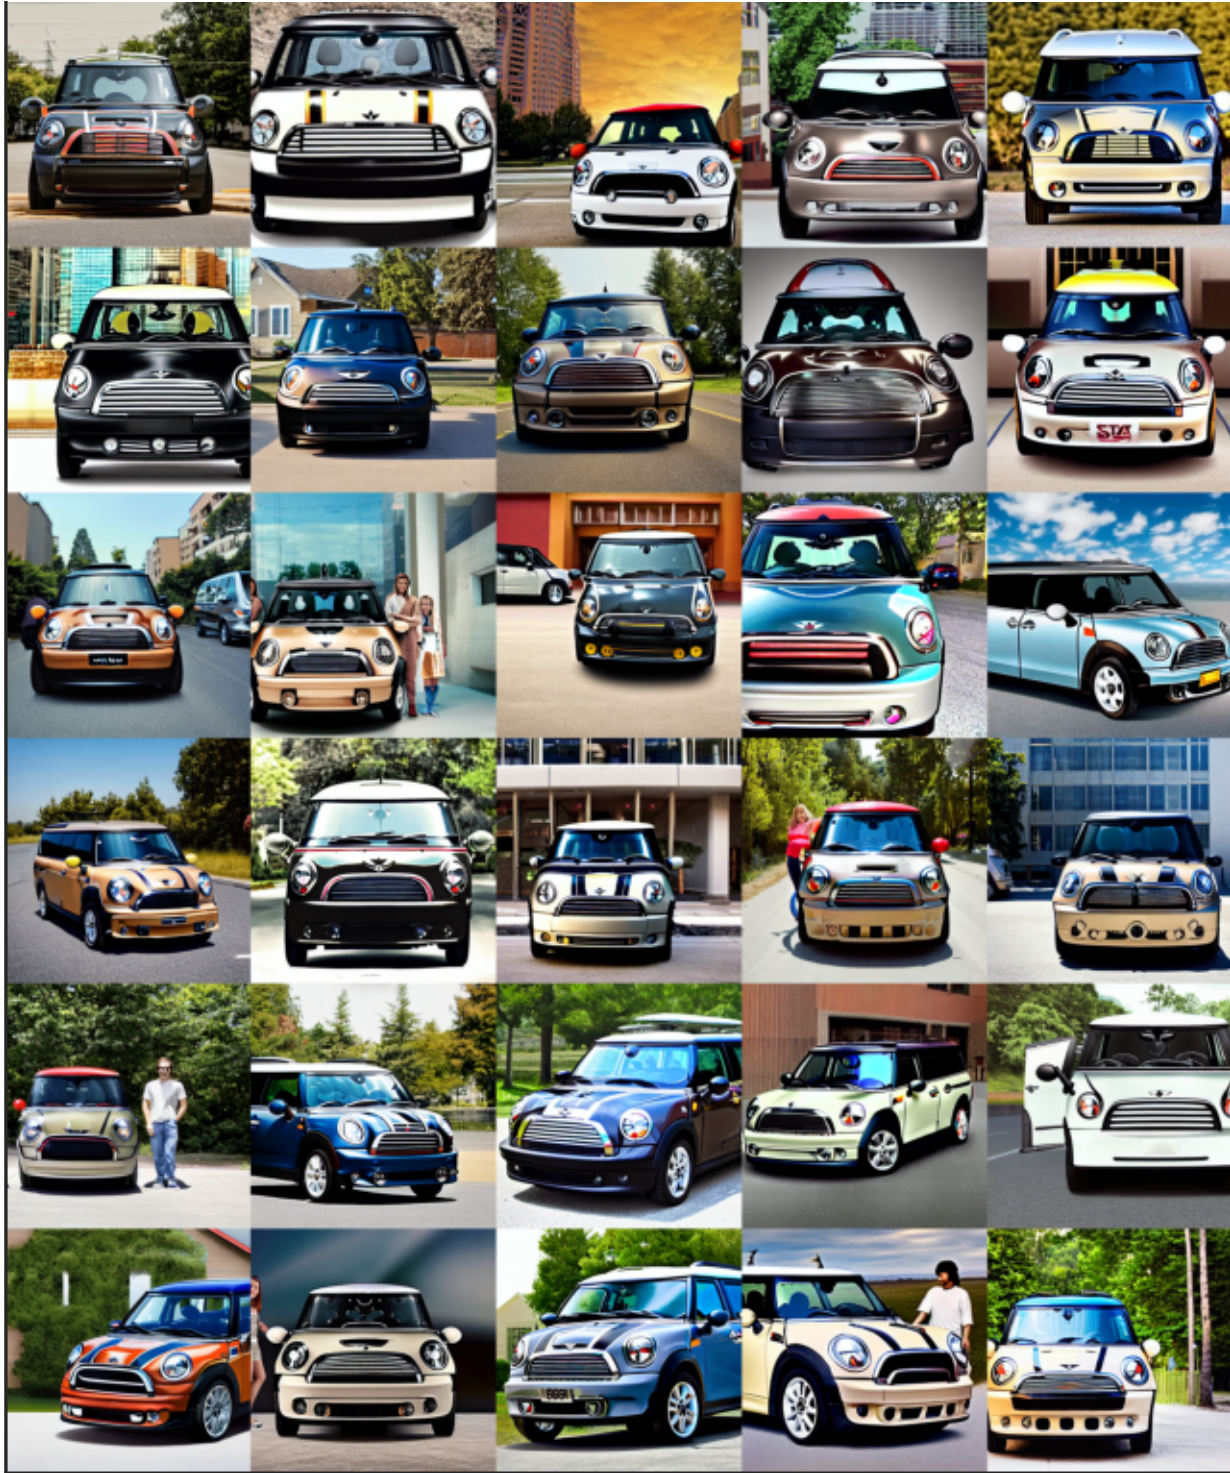

Figure 14. 30 samples from prompt “front view of (minivan:1.5) in front of sunny people.” that are misclassified as pickups by a ViT-L/32 [12]. Please note that often, there are no “people” in the background, indicating a shortcoming in the text-to-image model.



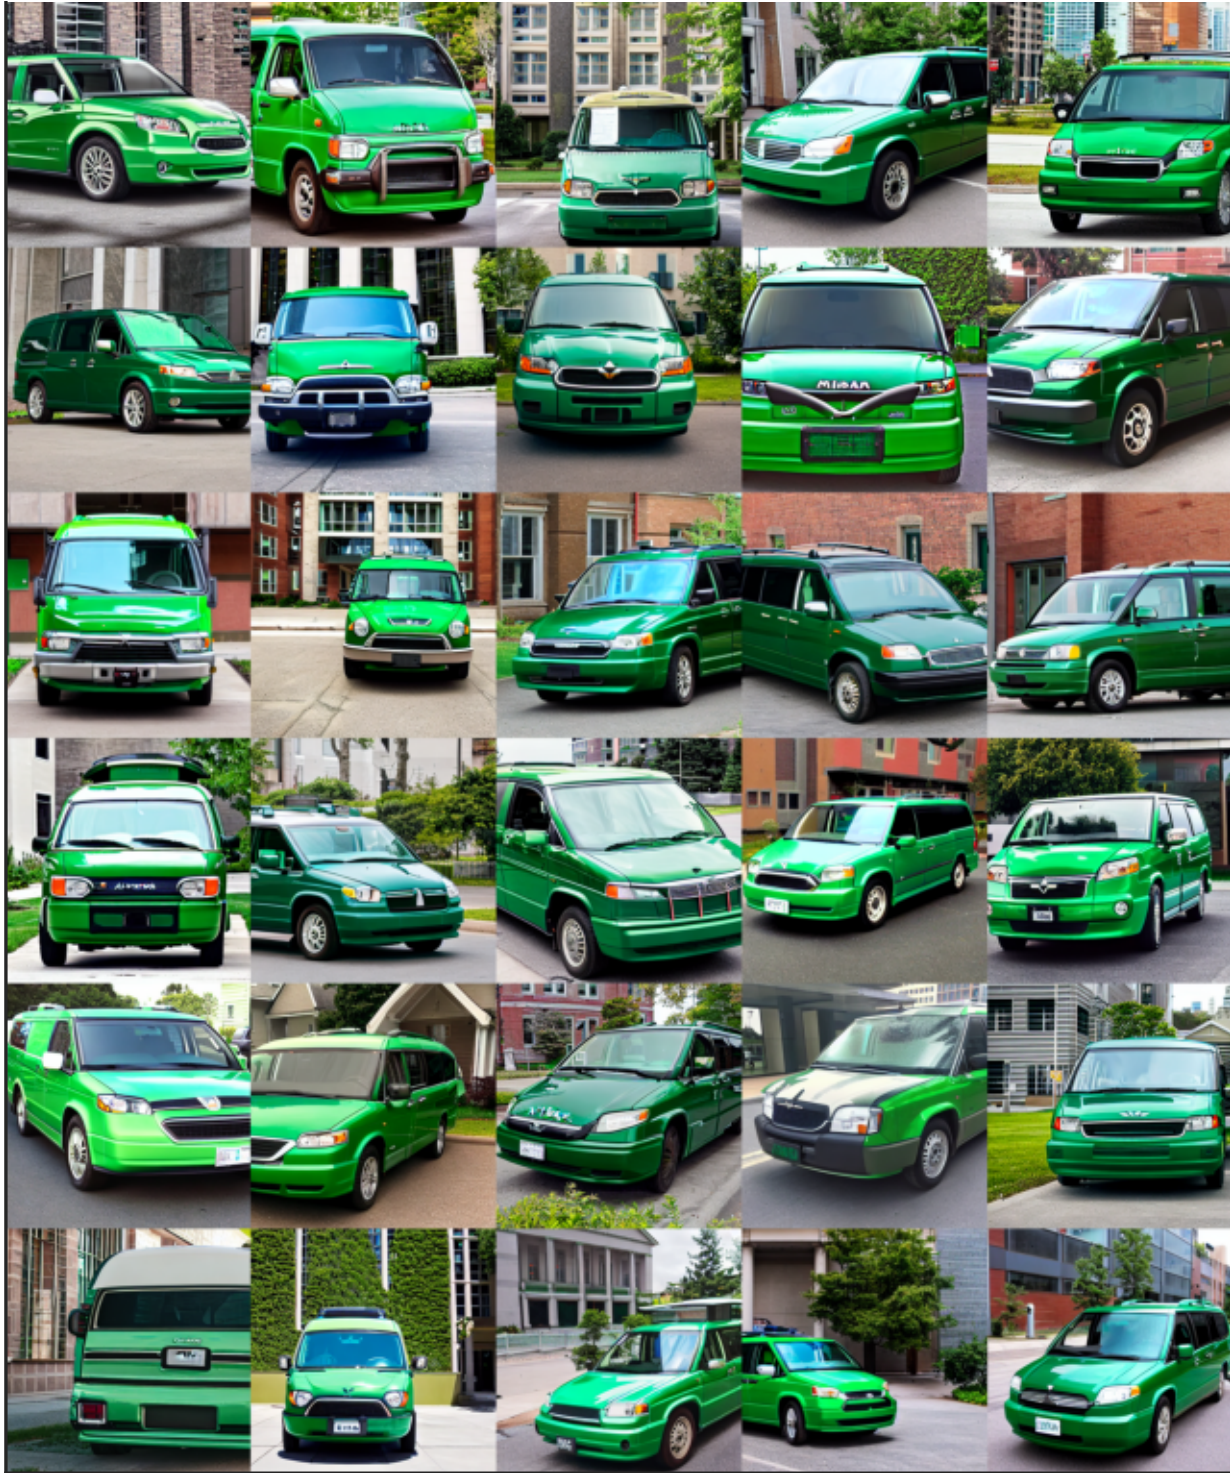

Figure 15. 30 samples from prompt “front view of large green (minivan:1.5) in front of lightning house.” that are misclassified as police-vans by a ResNet50. Please note that “lightning” is typically interpreted as a well illuminated scene and not as an actually lightning.



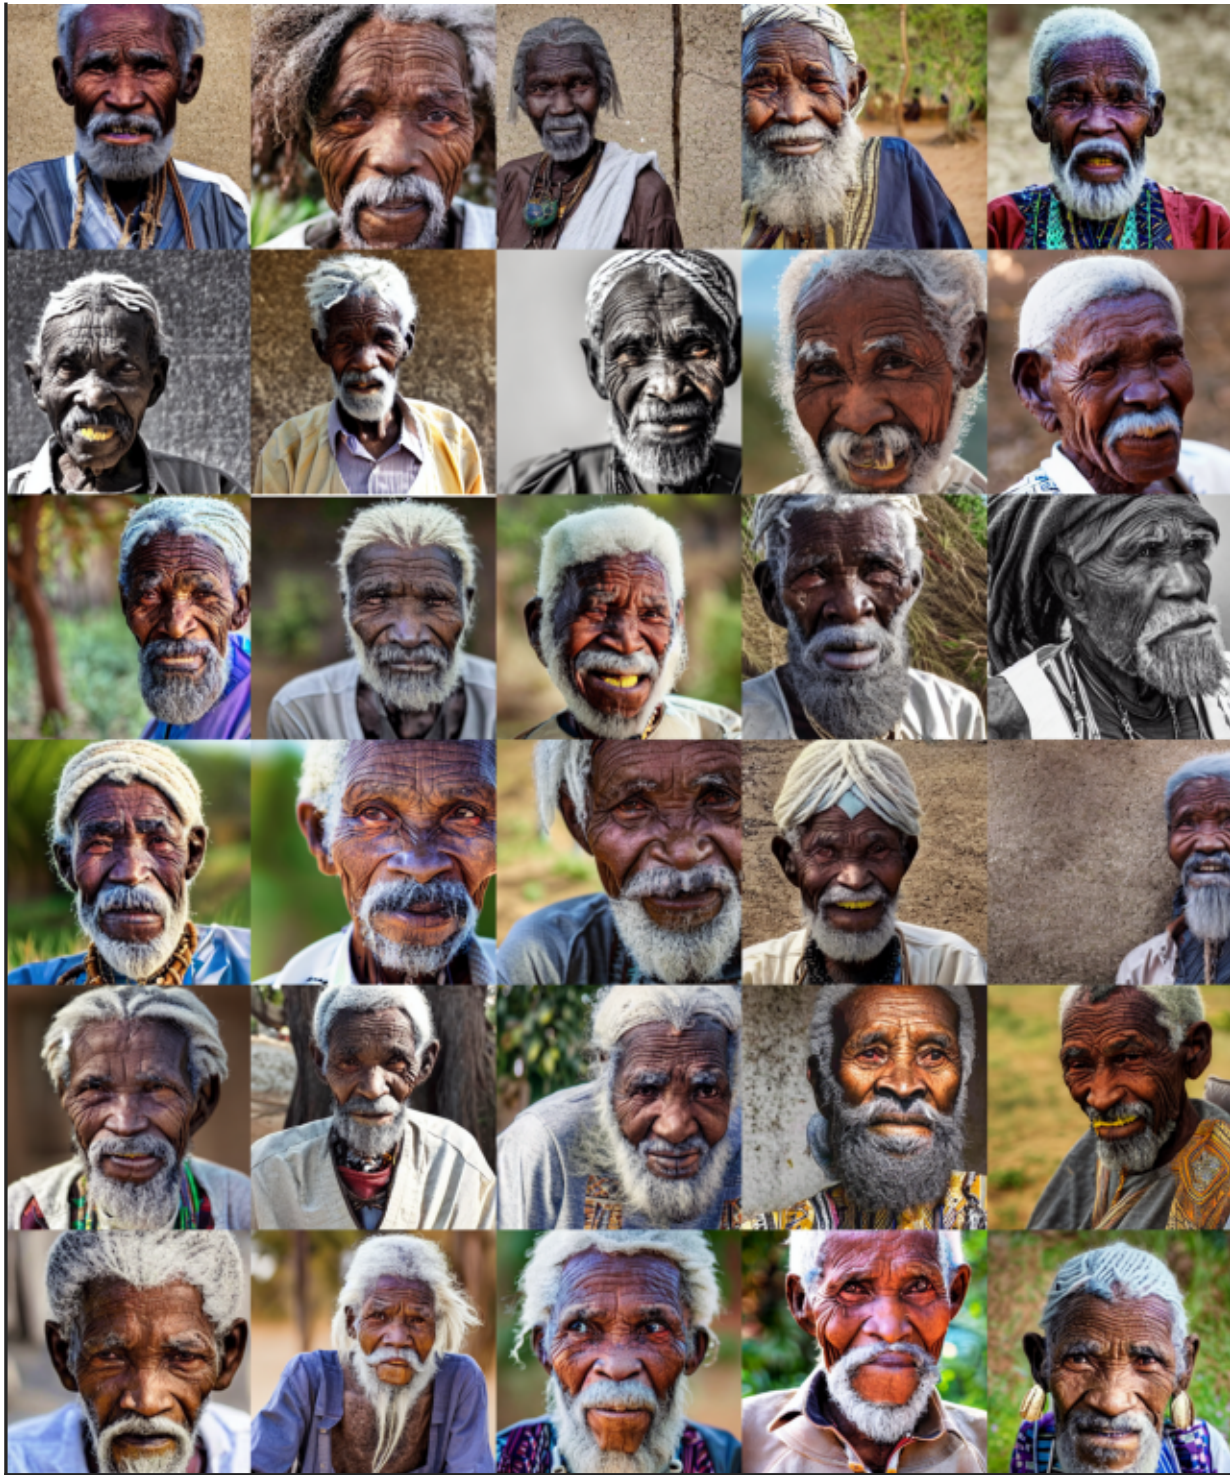

Figure 16. 30 samples from prompt “A old male african (person:1.5) with long hairs in front of background” that get a higher score for ape than for homo by a MLP-Mixer-B/16 [49] trained on ImageNet21k. We note that the samples from the text-to-image model are relatively similar and not fully representative of “old male african persons with long hairs”; this systematic error thus presumably correspond to a narrower subgroup than specified by above prompt.
